# Supplementary material for: Diversity Levels under Different Grazing Intensities in Semi-Wet Grasslands
Source: MDPI journal article supplement (doi:10.3390/land13040488), 2024-04-09
Supplement: s1 [file s1]

| 2013                   |                                                                   |          |                 |               |
|------------------------|-------------------------------------------------------------------|----------|-----------------|---------------|
| Family                 | Plant species                                                     | Ungrazed | Moderate grazed | Highly grazed |
| <b>Angiosperms</b>     |                                                                   |          |                 |               |
| <b>Apiaceae</b>        |                                                                   |          |                 |               |
|                        | <i>Daucus carota</i> L.                                           |          | 0.60            |               |
|                        | <i>Eryngium campestre</i> L.                                      | 0.22     | 0.11            |               |
| <b>Asteraceae</b>      |                                                                   |          |                 |               |
|                        | <i>Anthemis arvensis</i> L.                                       | 0.85     | 0.12            |               |
|                        | <i>Carlina vulgaris</i> L. subsp. <i>vulgaris</i>                 |          | 0.86            | 0.32          |
|                        | <i>Cirsium creticum</i> (Lam.) d' Urv                             | 0.31     |                 |               |
|                        | <i>Helichrysum luteoalbum</i> (L.) Rchb.                          |          | 0,69            | 3.62          |
|                        | <i>Hypochaeris radicata</i> L.                                    | 0.22     | 0,12            | 0.34          |
|                        | <i>Taraxacum</i> sect. <i>Ruderalia</i> Kirschner & al.           | 0.32     |                 |               |
| <b>Boraginaceae</b>    |                                                                   |          |                 |               |
|                        | <i>Myosotis sylvatica</i> Hoffm.                                  |          | 0.42            |               |
| <b>Brassicaceae</b>    |                                                                   |          |                 |               |
|                        | <i>Rorripa thracica</i> (Friseh) Fritch.                          | 0.67     |                 |               |
| <b>Caryophyllaceae</b> |                                                                   |          |                 |               |
|                        | <i>Dianthus cruentus</i> Griseb.                                  | 1.37     |                 |               |
|                        | <i>Lychnis coronaria</i> (L.) Desr.                               | 1.03     | 0.23            |               |
|                        | <i>Petrorhagia dubia</i> (Raf) G. Lopez & Romo                    |          | 0.43            |               |
| <b>Cistaceae</b>       |                                                                   |          |                 |               |
|                        | <i>Cistus creticus</i> L. subsp. <i>creticus</i>                  | 0.77     |                 |               |
|                        | <i>Tuberaria guttata</i> (L.) Fourr                               |          | 1.41            |               |
| <b>Crassulaceae</b>    |                                                                   |          |                 |               |
|                        | <i>Sedum amplexicaule</i> subsp. <i>tenuifolium</i> (Sm.) Greuter | 0,75     |                 |               |
| <b>Cyperaceae</b>      |                                                                   |          |                 |               |
|                        | <i>Carex leporina</i> L.                                          | 3.03     | 0.22            | 0.11          |
| <b>Dipsacaceae</b>     |                                                                   |          |                 |               |
|                        | <i>Knautia ambigua</i> Boss & Orth.                               |          | 0.40            |               |
|                        | <i>Scabiosa ochroleuca</i> L.                                     | 7.21     |                 |               |
| <b>Ericaceae</b>       |                                                                   |          |                 |               |
|                        | <i>Erica arborea</i> L.                                           | 0.34     |                 |               |
| <b>Fabaceae</b>        |                                                                   |          |                 |               |
|                        | <i>Dorycnium germanicum</i> (Gremli) Rikli                        |          | 2.30            |               |
|                        | <i>Lotus corniculatus</i> L.                                      | 0.44     | 2.15            | 8.90          |
|                        | <i>Medicago sativa</i> (L.)                                       | 0.10     |                 |               |
|                        | <i>Ornithopus compressus</i> L.                                   | 1.73     | 0.44            |               |

|                       |                                                                          |       |       |       |
|-----------------------|--------------------------------------------------------------------------|-------|-------|-------|
|                       | <i>Trifolium angustifolium</i> L.                                        | 0.32  |       |       |
|                       | <i>Trifolium arvense</i> L.                                              | 0.22  |       |       |
|                       | <i>Trifolium campestre</i> Schreb.                                       | 0.32  | 1.51  | 0.78  |
|                       | <i>Trifolium incarnatum</i> L. subsp.<br><i>molinerii</i> (Hornem.) Syme |       | 1.07  |       |
|                       | <i>Trifolium nigrescens</i> Viv.                                         |       | 0.40  |       |
|                       | <i>Trifolium ochroleucon</i> Huds.                                       | 0.65  |       |       |
|                       | <i>Trifolium repens</i> L.                                               |       | 3.26  | 6.38  |
|                       | <i>Trifolium scabrum</i> L.                                              | 0.10  |       |       |
|                       | <i>Trifolium stellatum</i> L.                                            | 0.88  |       |       |
|                       | <i>Vicia tetrasperma</i> (L.) Schreb.                                    | 1.77  |       |       |
| <b>Fagaceae</b>       |                                                                          |       |       |       |
|                       | <i>Quercus coccifera</i> (L.)                                            |       | 0.11  |       |
| <b>Geraniaceae</b>    |                                                                          |       |       |       |
|                       | <i>Erodium cicutarium</i> (L.) L' Her.                                   |       | 0.11  | 0.11  |
| <b>Hyacinthaceae</b>  |                                                                          |       |       |       |
|                       | <i>Muscari comosum</i> (L.) Mill                                         | 1.08  |       |       |
| <b>Hypericaceae</b>   |                                                                          |       |       |       |
|                       | <i>Hypericum perforatum</i> L.                                           | 1.73  | 0.43  | 0.11  |
| <b>Juncaceae</b>      |                                                                          |       |       |       |
|                       | <i>Juncus conglomeratus</i> L.                                           |       | 0,80  |       |
| <b>Lamiaceae</b>      |                                                                          |       |       |       |
|                       | <i>Teucrium chamaedrys</i> L. subsp.<br><i>chamaedrys</i>                | 0.10  | 0.10  |       |
|                       | <i>Thymus sibthorpii</i> Benth.                                          | 9.36  | 3.92  | 0.22  |
| <b>Orobanchaceae</b>  |                                                                          |       |       |       |
|                       | <i>Euphrasia stricta</i> J.F. Lehm                                       |       |       | 2.01  |
| <b>Plantaginaceae</b> |                                                                          |       |       |       |
|                       | <i>Plantago lanceolata</i> L.                                            | 2.44  | 3.85  | 7.43  |
| <b>Plumbaginaceae</b> |                                                                          |       |       |       |
|                       | <i>Armeria canescens</i> (Host.) Boiss                                   |       | 0.10  |       |
| <b>Poaceae</b>        |                                                                          |       |       |       |
|                       | <i>Aegilops neglecta</i> Bertol. subsp.<br><i>neglecta</i>               |       | 0.10  |       |
|                       | <i>Agrostis canina</i> L. subsp. <i>canina</i>                           | 18.08 | 14.73 | 1.80  |
|                       | <i>Aira elegans</i> Roem. & Schult.                                      | 0.54  | 1.04  |       |
|                       | <i>Anthoxanthum odoratum</i> L.                                          | 7.21  | 2.24  |       |
|                       | <i>Bromus hordeaceus</i> L.                                              | 0.51  | 7.33  | 0.56  |
|                       | <i>Bromus sterilis</i> L.                                                | 0.61  |       |       |
|                       | <i>Chrysopogon gryllus</i> (L.) Trin.                                    | 0.42  | 20.50 | 0.11  |
|                       | <i>Cynodon dactylon</i> (L.) Pers.                                       |       | 4.29  | 49.15 |
|                       | <i>Cynosurus cristatus</i> L.                                            |       | 1.42  | 2.92  |
|                       | <i>Cynosurus echinatus</i> L.                                            |       | 0.71  | 0.11  |
|                       | <i>Dactylis glomerata</i> L.                                             | 0.21  | 0.10  |       |
|                       | <i>Festuca ovina</i> aggr.                                               | 1.87  | 6.51  | 3.31  |

|                         |                                                               |       |      |      |
|-------------------------|---------------------------------------------------------------|-------|------|------|
|                         | <i>Holcus lanatus</i> L. subsp. <i>lanatus</i>                | 0.50  |      |      |
|                         | <i>Holcus mollis</i> L. subsp. <i>mollis</i>                  | 1.59  |      | 0.22 |
|                         | <i>Hordeum bulbosum</i> L.                                    | 0.23  |      |      |
|                         | <i>Lolium perenne</i> L.                                      | 0.62  |      | 4.92 |
|                         | <i>Phleum pratense</i> L.                                     |       |      | 0.11 |
|                         | <i>Poa pratensis</i> L. subsp. <i>pratensis</i>               | 0.11  |      | 0.22 |
|                         | <i>Achnatherum bromoides</i> (L.) P. Beauv.                   | 2.95  |      | 0.33 |
| <b>Polygonaceae</b>     |                                                               |       |      |      |
|                         | <i>Polygonum aviculare</i> L.                                 | 1.50  |      |      |
|                         | <i>Rumex acetosella</i> L.                                    | 0.81  | 0.46 |      |
| <b>Rosaceae</b>         |                                                               |       |      |      |
|                         | <i>Filipendula vulgaris</i> Moench                            |       | 2.83 | 0.89 |
|                         | <i>Potentilla argentea</i> L.                                 | 1.44  | 0.32 | 4.92 |
|                         | <i>Prunus spinosa</i> subsp. <i>dasyphylla</i> (Schur) Domin  | 0.80  | 0.82 |      |
|                         | <i>Pyrus spinosa</i> Forssk.                                  | 0.61  |      |      |
|                         | <i>Rosa canina</i> L.                                         | 0.83  | 0.10 |      |
|                         | <i>Rubus sanctus</i> Schreb.                                  | 18.67 | 0.11 | 0.11 |
|                         | <i>Sanguisorba minor</i> Scop.                                | 1.52  | 0.41 |      |
| <b>Rubiaceae</b>        |                                                               |       |      |      |
|                         | <i>Gallium verum</i> L. subsp. <i>verum</i>                   | 0.31  | 2.93 |      |
| <b>Veronicaceae</b>     |                                                               |       |      |      |
|                         | <i>Linaria pelisseriana</i> (L.) Mill                         | 0.32  | 0.11 |      |
| <b>Violaceae</b>        |                                                               |       |      |      |
|                         | <i>Viola macedonica</i> Boiss. & Heldr.                       | 1.53  |      |      |
| <b>Pteridophytes</b>    |                                                               |       |      |      |
| <b>Dennstaedtiaceae</b> |                                                               |       |      |      |
|                         | <i>Pteridium aquilinum</i> (L.) Kuhn. subsp. <i>aquilinum</i> | 2.48  | 0.90 |      |
| <b>2014</b>             |                                                               |       |      |      |

| Family              | Plant species                                             | Ungrazed | Moderate grazed | Highly grazed |
|---------------------|-----------------------------------------------------------|----------|-----------------|---------------|
| <b>Apiaceae</b>     |                                                           |          |                 |               |
|                     | <i>Daucus carota</i> L.                                   |          | 0.1             |               |
|                     | <i>Eringium campestre</i> L.                              | 0.1      | 0.4             |               |
|                     | <i>Torilis ucranica</i> Spreng.                           | 0.2      | 0.3             |               |
| <b>Asparagaceae</b> |                                                           |          |                 |               |
|                     | <i>Asparagus officinalis</i> L. subsp. <i>officinalis</i> | 0.3      |                 |               |
| <b>Asteraceae</b>   |                                                           |          |                 |               |
|                     | <i>Achillea millefolium</i> L.                            | 0.3      |                 |               |
|                     | <i>Aetheorhiza bulbosa</i> (L.) Cass.                     | 0.1      |                 |               |
|                     | <i>Anthemis arvensis</i> L.                               | 3        | 0.3             |               |

|                        |                                                                                  |     |      |      |
|------------------------|----------------------------------------------------------------------------------|-----|------|------|
|                        | <i>Carlina vulgaris</i> L. subsp. <i>vulgaris</i>                                | 0.2 |      |      |
|                        | <i>Chondrilla juncea</i> L.                                                      |     |      | 0.8  |
|                        | <i>Helichrysum luteoalbum</i> (L.) Rchb.                                         |     | 0.4  | 0.7  |
|                        | <i>Pilosella leucopsilon</i> subsp. <i>pilisquama</i> (Nägeli & Peter) Gottschl. | 0.1 | 0.2  |      |
|                        | <i>Hypochaeris radicata</i> L.                                                   |     | 1.8  |      |
| <b>Brassicaceae</b>    |                                                                                  |     |      |      |
|                        | <i>Rorripa thracica</i> (Friseh) Fritch.                                         | 0.8 |      |      |
| <b>Caryophyllaceae</b> |                                                                                  |     |      |      |
|                        | <i>Dianthus cruentus</i> Griseb.                                                 |     | 0.8  |      |
|                        | <i>Lychnis coronaria</i> (L.) Desr.                                              | 0.8 | 0.1  |      |
|                        | <i>Petrorrhagia dubia</i> (Raf) G. Lopez & Romo                                  | 0.2 | 0.7  |      |
| <b>Cistaceae</b>       |                                                                                  |     |      |      |
|                        | <i>Cistus creticus</i> L. subsp. <i>creticus</i>                                 | 0.2 |      |      |
|                        | <i>Tuberaria gutata</i> (L.) Fourr                                               | 0.4 |      |      |
| <b>Cyperaceae</b>      |                                                                                  |     |      |      |
|                        | <i>Carex leporine</i> L.                                                         | 0.1 | 0.1  |      |
| <b>Dipsacaceae</b>     |                                                                                  |     |      |      |
|                        | <i>Knautia ambigua</i> Boss & Orth.                                              | 0.1 |      |      |
|                        | <i>Scabiosa ochroleuca</i> L.                                                    | 7.3 | 0.7  |      |
| <b>Ericaceae</b>       |                                                                                  |     |      |      |
|                        | <i>Erica arborea</i> L.                                                          | 0.8 |      |      |
| <b>Fabaceae</b>        |                                                                                  |     |      |      |
|                        | <i>Lotus angustissimus</i> L.                                                    |     | 0.3  | 0.3  |
|                        | <i>Lotus corniculatus</i> L.                                                     | 0.1 | 1.67 | 15.2 |
|                        | <i>Ornithopus compressus</i> L.                                                  | 0.1 | 0.2  |      |
|                        | <i>Trifolium angustifolium</i> L.                                                |     | 0.1  |      |
|                        | <i>Trifolium campestre</i> Schreb.                                               | 0.2 | 0.9  | 0.4  |
|                        | <i>Trifolium repens</i> L.                                                       | 0.1 | 3.7  | 0.3  |
|                        | <i>Trifolium stellatum</i> L.                                                    |     | 1.56 |      |
|                        | <i>Vicia tetrasperma</i> (L.) Schreb.                                            | 0.1 |      |      |
| <b>Gentianaceae</b>    |                                                                                  |     |      |      |
|                        | <i>Centaurium erythraea</i> Rafn                                                 | 1.4 |      |      |
| <b>Geraniaceae</b>     |                                                                                  |     |      |      |

|                       |                                                                |      |      |      |
|-----------------------|----------------------------------------------------------------|------|------|------|
|                       | <i>Erodium cicutarium</i> (L.)<br>L'Her                        | 0.1  |      |      |
|                       | <i>Geranium sanguineum</i> L.                                  | 0.2  |      | 0.1  |
| <b>Hypericaceae</b>   |                                                                |      |      |      |
|                       | <i>Hypericum perforatum</i> L.                                 | 1.0  |      |      |
| <b>Juncaceae</b>      |                                                                |      |      |      |
|                       | <i>Luzula campestris</i> (L.) D.C.<br>subsp. <i>campestris</i> | 0.8  | 0.2  |      |
| <b>Lamiaceae</b>      |                                                                |      |      |      |
|                       | <i>Prunella laciniata</i> (L.) L.                              | 0.1  | 0.1  | 0.4  |
|                       | <i>Teucrium chamaedrys</i> L.<br>Subsp. <i>chamaedrys</i>      | 0.7  |      |      |
|                       | <i>Thymus sibthorpii</i> Benth.                                | 12.3 | 8.1  | 0.3  |
| <b>Linaceae</b>       |                                                                |      |      |      |
|                       | <i>Linum trigynum</i> L.                                       | 0.2  | 0.4  |      |
| <b>Orobanchaceae</b>  |                                                                |      |      |      |
|                       | <i>Euphrasia stricta</i> J.F. Lehm                             |      | 0.2  | 1.6  |
| <b>Plantaginaceae</b> |                                                                |      |      |      |
|                       | <i>Plantago lanceolata</i> L.                                  | 0.8  | 9.6  | 18.8 |
| <b>Poaceae</b>        |                                                                |      |      |      |
|                       | <i>Agrostis canina</i> L. subsp.<br><i>canina</i>              | 34.7 | 22.1 | 9.2  |
|                       | <i>Aira elegans</i> Schur.                                     | 0.1  | 1.0  |      |
|                       | <i>Anthoxanthum odoratum</i> L.                                | 3.4  | 2.5  | 0.2  |
|                       | <i>Arrhenatherum elatius</i> (L.)<br>J. Presl. & C. Presl.     |      | 0.2  |      |
|                       | <i>Bromus hordeaceus</i> L.                                    | 0.1  | 2.9  | 0.5  |
|                       | <i>Bromus sterilis</i> L.                                      |      | 0.2  |      |
|                       | <i>Chrysopogon gryllus</i> (L.)<br>Trin.                       |      | 6.42 |      |
|                       | <i>Cynodon dactylon</i> (L.) Pers.                             | 4.27 |      | 36.8 |
|                       | <i>Cynosurus cristatus</i> L.                                  |      | 1.4  | 3.7  |
|                       | <i>Cynosurus echinatus</i> L.                                  |      | 1.4  |      |
|                       | <i>Dactylis glomerata</i> L.                                   | 0.6  | 0.4  |      |
|                       | <i>Festuca ovina</i> aggr.                                     |      | 0.2  | 0.2  |
|                       | <i>Holcus lanatus</i> L. subsp.<br><i>lanatus</i>              |      | 0.1  |      |
|                       | <i>Holcus molis</i> L. subsp.<br><i>molis</i>                  |      | 4.4  | 5.5  |
|                       | <i>Lolium perenne</i> L.                                       |      | 3    | 3    |
|                       | <i>Vulpia myuros</i> (L.) C.C.<br>Gmel.                        |      | 5.2  |      |
| <b>Polygonaceae</b>   |                                                                |      |      |      |
|                       | <i>Rumex acetosella</i> (L.)                                   | 23.9 |      |      |
| <b>Rosaceae</b>       |                                                                |      |      |      |

|                        |                                                                                  |                 |                        |                      |
|------------------------|----------------------------------------------------------------------------------|-----------------|------------------------|----------------------|
|                        | <i>Fillipendula vulgaris</i> Moench.                                             |                 | 1.3                    | 0.2                  |
|                        | <i>Potentilla argentea</i> L.                                                    | 0.6             | 1.3                    | 0.1                  |
|                        | <i>Phleum pratense</i> L.                                                        |                 | 0.2                    | 0.2                  |
|                        | <i>Prunus spinosa</i> L. subsp. <i>dasyphylla</i> (Schur) Domin                  | 0.2             | 0.6                    |                      |
|                        | <i>Rubus sanctus</i> Schreb.                                                     | 0.1             | 2.2                    |                      |
|                        | <i>Sanguisorba minor</i> Scop.                                                   | 1.1             |                        | 0.3                  |
| <b>Rubiaceae</b>       |                                                                                  |                 |                        |                      |
|                        | <i>Asperula purpurea</i> (L.) Ehrend.                                            |                 |                        | 0.1                  |
|                        | <i>Crusianella latifolia</i> L.                                                  | 0.3             |                        |                      |
|                        | <i>Gallium verum</i> L. subsp. <i>verum</i>                                      | 0.9             | 0.9                    | 0.2                  |
| <b>Violaceae</b>       |                                                                                  |                 |                        |                      |
|                        | <i>Viola macedonica</i> Boiss. & Heldr.                                          | 0.6             | 0.1                    |                      |
| <b>2015</b>            |                                                                                  |                 |                        |                      |
| <b>Famiy</b>           | <b>Plant species</b>                                                             | <b>Ungrazed</b> | <b>Moderate grazed</b> | <b>Highly grazed</b> |
| <b>Amaryllidaceae</b>  |                                                                                  |                 |                        |                      |
|                        | <i>Galanthus elwessi</i> Hook. f.                                                |                 | 0.10                   |                      |
| <b>Apiaceae</b>        |                                                                                  |                 |                        |                      |
|                        | <i>Eringium campestre</i> L.                                                     | 0.30            | 0.80                   | 0.3                  |
|                        | <i>Torilis ucranica</i> Spreng.                                                  | 3.33            |                        |                      |
| <b>Asteraceae</b>      |                                                                                  |                 |                        |                      |
|                        | <i>Achillea millefolium</i> L.                                                   |                 | 0.10                   |                      |
|                        | <i>Anthemis arvensis</i> L.                                                      | 2.85            | 0.10                   |                      |
|                        | <i>Helichrysum luteoalbum</i> (L.) Rchb.                                         |                 | 0.93                   | 1.7                  |
|                        | <i>Hypochaeris radicata</i> L.                                                   |                 | 1.25                   | 0.6                  |
|                        | <i>Pilosella leucopsilon</i> subsp. <i>pilisquama</i> (Nägeli & Peter) Gottschl. | 0.11            |                        |                      |
| <b>Boraginaceae</b>    |                                                                                  |                 |                        |                      |
|                        | <i>Myosotis sylvatica</i> Hoffm.                                                 |                 |                        | 0.2                  |
| <b>Caryophyllaceae</b> |                                                                                  |                 |                        |                      |
|                        | <i>Dianthus cruentus</i> Griseb.                                                 | 0.10            | 0.61                   | 0.3                  |
|                        | <i>Moenchia mantica</i> (L.) Bartl.                                              | 0.51            |                        |                      |
|                        | <i>Silene coronaria</i> (L.) Clairv.                                             | 1.01            |                        |                      |
| <b>Cyperaceae</b>      |                                                                                  |                 |                        |                      |
|                        | <i>Carex leporine</i> L.                                                         |                 | 2.33                   | 0.5                  |
| <b>Dipsacaceae</b>     |                                                                                  |                 |                        |                      |
|                        | <i>Scabiosa ochroleuca</i> L.                                                    | 4.64            | 0.31                   |                      |
| <b>Fabaceae</b>        |                                                                                  |                 |                        |                      |

|                                                                            |       |      |      |
|----------------------------------------------------------------------------|-------|------|------|
| <i>Hippocrepis emerus</i> subsp. <i>emeroides</i> (Boiss & Spruner) Lassen | 0.10  |      |      |
| <i>Lotus corniculatus</i> L.                                               | 0.10  |      | 12.2 |
| <i>Medicago sativa</i> (L.)                                                |       | 0.51 |      |
| <i>Ornithopus compressus</i> L.                                            | 0.10  |      |      |
| <i>Trifolium campestre</i> Schreb.                                         | 0.10  | 2.33 | 1.9  |
| <i>Trifolium hirtum</i> All.                                               |       | 0.10 |      |
| <i>Trifolium incarnatum</i> L.                                             |       | 0.30 |      |
| <i>Trifolium ochroleucon</i> Huds.                                         |       | 0.71 | 4.9  |
| <i>Trifolium repens</i> L.                                                 |       | 0.30 | 0.3  |
| <i>Trifolium stellatum</i> L.                                              |       | 0.50 |      |
| <b>Gentianaceae</b>                                                        |       |      |      |
| <i>Centaurium erythraea</i> Rafm                                           | 0.61  |      |      |
| <b>Hyacinthaceae</b>                                                       |       |      |      |
| <i>Muscari comosum</i> (L.) Mill.                                          | 0.20  |      |      |
| <b>Hypericaceae</b>                                                        |       |      |      |
| <i>Hypericum perforatum</i> L.                                             | 0.81  |      |      |
| <b>Juncaceae</b>                                                           |       |      |      |
| <i>Luzula campestris</i> (L.) D.C.                                         | 1.12  |      |      |
| <b>Lamiaceae</b>                                                           |       |      |      |
| <i>Prunella laciniata</i> (L.) L.                                          |       | 0.10 |      |
| <i>Stachys angustifolia</i> M. Bieb.                                       | 0.50  |      |      |
| <i>Teucrium chamaedrys</i> L. subsp. <i>chamaedrys</i>                     | 0.10  |      |      |
| <i>Thymus sibthorpii</i> Benth.                                            | 5.97  | 2.26 |      |
| <b>Orobanchaceae</b>                                                       |       |      |      |
| <i>Euphrasia stricta</i> J.F. Lehm                                         |       | 0.20 | 0.5  |
| <b>Plantaginaceae</b>                                                      |       |      |      |
| <i>Plantago lanceolata</i> L.                                              | 0.10  | 2.64 | 2    |
| <b>Poaceae</b>                                                             |       |      |      |
| <i>Agrostis canina</i> L. subsp. <i>canina</i>                             | 36.45 | 7.56 |      |
| <i>Aira elegans</i> Roem. & Schult                                         | 0.10  | 1.93 |      |
| <i>Anthoxanthum odoratum</i> L.                                            | 10.28 | 9.56 | 11.7 |
| <i>Arrhenatherum elatius</i> (L.) J. Presl. & C. Presl.                    | 0.20  |      |      |
| <i>Brachypodium sylvaticum</i> (Huds) P. Beauv. subsp. <i>sylvaticum</i>   | 0.71  |      |      |
| <i>Bromus hordeaceus</i> L.                                                | 0.10  | 4    | 2.1  |
| <i>Bromus squarrosus</i> L. subsp. <i>squarrosus</i>                       |       | 8.23 |      |
| <i>Chrysopogon gryllus</i> (L.) Trin.                                      | 0.20  | 7.07 |      |
| <i>Cynodon dactylon</i> (L.) Pers.                                         |       | 0.61 | 21.7 |
| <i>Cynosurus cristatus</i> L.                                              |       | 1.81 | 3.3  |

|                                                                 |       |       |     |
|-----------------------------------------------------------------|-------|-------|-----|
| <i>Cynosurus echinatus</i> L.                                   |       | 0.93  | 0.4 |
| <i>Dactylis glomerata</i> L.                                    |       | 0.20  | 0.1 |
| <i>Festuca ovina</i> aggr.                                      |       | 3.63  | 0.9 |
| <i>Holcus lanatus</i> L. subsp. <i>lanatus</i>                  | 0.71  | 2.13  |     |
| <i>Holcus molis</i> L. subsp. <i>molis</i>                      |       |       | 2   |
| <i>Lolium perenne</i> L.                                        |       | 0.91  | 11  |
| <i>Phleum pratense</i> L.                                       |       |       | 0.5 |
| <i>Poa pratensis</i> L.                                         | 0.10  | 0.52  | 1.8 |
| <i>Taeniatherum caput-medusae</i> (L.) Nevski                   |       | 5.05  | 8.7 |
| <i>Vulpia myuros</i> (L.) C.C. Gmel.                            | 0.31  | 20.31 | 5.2 |
| <b>Polygonaceae</b>                                             |       |       |     |
| <i>Polygonum aviculare</i> L.                                   |       | 0.10  |     |
| <i>Rumex acetosella</i> (L.)                                    | 0.30  | 1.94  | 0.1 |
| <b>Rosaceae</b>                                                 |       |       |     |
| <i>Fillipendula vulgaris</i> Moench.                            | 0.90  |       | 1.8 |
| <i>Potentilla argentea</i> L.                                   |       | 0.80  | 1.9 |
| <i>Prunus spinosa</i> L. subsp. <i>dasyphylla</i> (Schur) Domin | 1.5   |       |     |
| <i>Pyrus spinosa</i> Forssk.                                    | 0.30  |       |     |
| <i>Rubus sanctus</i> Schreb.                                    | 17.38 |       |     |
| <i>Sanguisorba minor</i> Scop.                                  | 0.10  | 0.51  |     |
| <b>Rubiaceae</b>                                                |       |       |     |
| <i>Gallium verum</i> L. subsp. <i>verum</i>                     | 0.21  | 0.94  | 1.2 |
| <b>Violaceae</b>                                                |       |       |     |
| <i>Viola macedonica</i> Boiss. & Heldr.                         | 0.31  |       |     |
